# Supplementary material for: The Impact of Telemedicine on Parkinson’s Care during the COVID-19 Pandemic: An Italian Online Survey
Source: MDPI journal article supplement (doi:10.3390/healthcare10061065), 2022-06-08
Supplement: s1 [file s1]

---

## L'IMPATTO DEL COVID-19 SULL'USO DELLA TELEMEDICINA NELLA CURA DEI DISORDINI DEL MOVIMENTO

---

Gentile dottore,

siamo un team di psicologi del Policlinico di Milano e sociologi dell'Università

Cattolica impegnati nella ricerca di nuovi modelli sanitari capaci di supportare adeguatamente i pazienti con disturbi del movimento anche in questo momento di emergenza Covid-19.

Durante questo periodo, per ridurre gli accessi in ospedale e le possibilità di contagio, molti controlli neurologici in presenza sono stati convertiti in visite da remoto attraverso differenti modalità (Telefono, Email, SMS, Chat, Videoconsulto).

Ti chiediamo solo 10 minuti del tuo tempo per avere la tua opinione sulla qualità dei consulti neurologici a distanza erogati durante questo periodo pandemico. La tua partecipazione è volontaria, in qualsiasi momento potrai interrompere la compilazione senza dover fornire alcuna giustificazione.

I dati che ti riguardano saranno ritenuti come strettamente confidenziali e soggetti ad anonimato, i risultati potranno essere portati a conoscenza di terzi o pubblicati, ma escludendo ogni possibile riferimento personale. Ci si atterrà in ogni caso alle disposizioni normative vigenti relative alla tutela della privacy del soggetto (art.11 D.Lgs. 196/2003 – Codice in materia di protezione dei dati personali e all'art. 13 del GDPR 679/16 – “Regolamento europeo sulla protezione dei dati personali”).

---

Proseguendo con la compilazione, acconsenti al trattamento dei dati  
(se non acconsenti, non potrai partecipare alla ricerca)

☐ Acconsento

☐ Non acconsento

---

Età

---

-----

Genere

☐ Maschio

☐ Femmina

Regione in cui lavori:

- ☐ Abruzzo
- ☐ Basilicata
- ☐ Calabria
- ☐ Campania
- ☐ Emilia-Romagna
- ☐ Friuli Venezia Giulia
- ☐ Lazio
- ☐ Liguria
- ☐ Lombardia
- ☐ Marche
- ☐ Molise
- ☐ Piemonte
- ☐ Puglia
- ☐ Sardegna
- ☐ Sicilia
- ☐ Toscana
- ☐ Trentino-Alto Adige
- ☐ Umbria
- ☐ Valle d'Aosta
- ☐ Veneto

---

Luogo di lavoro

- ☐ Università
  - ☐ Ospedale Pubblico
  - ☐ Ospedale Privato
  - ☐ Studio Privato
  - ☐ Altro (specificare) \_\_\_\_\_
- 

Anni di esperienza lavorativa

- ☐ 0-5 anni
  - ☐ 6-15 anni
  - ☐ 16-25 anni
  - ☐ 26-35 anni
  - ☐ > 35 anni
- 

Con quanti colleghi hai lavorato costantemente nell'ultimo anno?

- ☐ Da solo/a
  - ☐ 1 - 3
  - ☐ 4 - 10
  - ☐ > 10
-

Hai prestato servizio in un reparto Covid-19?

- ☐ Sì
- ☐ No
- 

Hai mai fornito un consulto neurologico a distanza prima della pandemia Covid-19 (per es. telefono, SMS, Chat, E-mail, Videoconsulto)?

- ☐ Sì
- ☐ No
- 

Durante la pandemia Covid-19, hai avuto la possibilità di fornire soluzioni alternative alla visita neurologica in presenza (per es. telefono, SMS, Chat, E-mail, Videoconsulto)?

- ☐ Sì
- ☐ No
- 

Chi ti ha informato della possibilità di erogare una visita neurologica a distanza?

- ☐ L'Ospedale per cui presto servizio
- ☐ È stata una mia proposta
- ☐ Me lo ha proposto il paziente
-

Hai utilizzato una piattaforma istituzionale per erogare il consulto neurologico a distanza?

- ☐ Sì
- ☐ No
- 

Hai ricevuto assistenza tecnica/training per erogare il consulto neurologico a distanza?

- ☐ Sì
- ☐ No
- 

Se sì, in che misura è stato utile?

- ☐ Per nulla
- ☐ Leggermente
- ☐ Un po'
- ☐ Molto
- ☐ Moltissimo
- 

Hai ricevuto delle linee guida istituzionali per erogare il consulto?

- ☐ Sì
- ☐ No
-

Se sì, in che misura sono state utili?

- ☐ Per nulla
  - ☐ Leggermente
  - ☐ Un po'
  - ☐ Molto
  - ☐ Moltissimo
- 

Durante la pandemia Covid-19, per quali problematiche ti hanno richiesto assistenza più frequentemente? (possibili più risposte)

- ☐ Visita di controllo periodico
  - ☐ Prescrizioni farmacologiche
  - ☐ Regolazione dei parametri DBS
  - ☐ Comparsa di effetti collaterali ai farmaci (dispercezioni visive, alterazioni del comportamento, etc.)
  - ☐ Altro (specificare....) \_\_\_\_\_
-

Quali strumenti digitali hai utilizzato per erogare il consulto neurologico a distanza? (possibili più risposte)

☐ Telefono

☐ Email

☐ SMS

☐ Chat

☐ Videoconsulto es. videochiamata in WhatsApp, Skype, Zoom, Microsoft Teams

☐ Altro \_\_\_\_\_

-----



ORA TI CHIEDIAMO DI FOCALIZZARTI SULLA TUA ESPERIENZA DI VIDEOCONSULTO E DI PENSARE AGLI ASPETTI TECNICI. ESPRIMI IL TUO GRADO DI ACCORDO/DISACCORDO CON LE SEGUENTI AFFERMAZIONI

|                                                                                                                  | Per nulla<br>d'accordo | Abbastanza<br>in disaccordo | Né in<br>accordo né in<br>disaccordo | Abbastanza<br>d'accordo | Molto<br>d'accordo    |
|------------------------------------------------------------------------------------------------------------------|------------------------|-----------------------------|--------------------------------------|-------------------------|-----------------------|
| 1. Ritengo di avere le competenze informatiche necessarie                                                        | <input type="radio"/>  | <input type="radio"/>       | <input type="radio"/>                | <input type="radio"/>   | <input type="radio"/> |
| 2. Ritengo di essere in possesso di strumentazioni digitali adeguate                                             | <input type="radio"/>  | <input type="radio"/>       | <input type="radio"/>                | <input type="radio"/>   | <input type="radio"/> |
| 3. Ritengo di aver ricevuto tutte le istruzioni necessarie per l'erogazione del consulto (password, link, altro) | <input type="radio"/>  | <input type="radio"/>       | <input type="radio"/>                | <input type="radio"/>   | <input type="radio"/> |
| 4. Ritengo che sia stato semplice concordare un appuntamento con il paziente                                     | <input type="radio"/>  | <input type="radio"/>       | <input type="radio"/>                | <input type="radio"/>   | <input type="radio"/> |
| 5. La qualità dell'audio durante il consulto neurologico è stata adeguata                                        | <input type="radio"/>  | <input type="radio"/>       | <input type="radio"/>                | <input type="radio"/>   | <input type="radio"/> |

6. La qualità del video durante il consulto neurologico è stata adeguata

☐☐☐☐☐

7. Ogni volta che ho riscontrato problemi tecnici ho risolto facilmente e rapidamente

☐☐☐☐☐

8. È stato semplice usare i sistemi digitali per erogare il consulto

☐☐☐☐☐

9. È stato facile imparare a usare i sistemi digitali per il consulto

☐☐☐☐☐

10. Credo che potrei diventare sempre più esperto utilizzando servizi digitali per erogare prestazioni sanitarie

☐☐☐☐☐

11. Ritengo che la privacy del paziente sia stata rispettata

☐☐☐☐☐

ORA PENSA ALLA TUA ESPERIENZA DI VIDEOCONSULTO NEUROLOGICO A DISTANZA  
ED ESPRIMI IL GRADO DI ACCORDO/DISACCORDO CON LE SEGUENTI AFFERMAZIONI

|                                                                                                                              | Per nulla<br>d'accordo | Abbastanza<br>in disaccordo | Né in<br>accordo né in<br>disaccordo | Abbastanza<br>d'accordo | Molto<br>d'accordo    |
|------------------------------------------------------------------------------------------------------------------------------|------------------------|-----------------------------|--------------------------------------|-------------------------|-----------------------|
| 12. Mi ha permesso di risparmiare tempo riuscendo a visitare un numero maggiore di pazienti                                  | <input type="radio"/>  | <input type="radio"/>       | <input type="radio"/>                | <input type="radio"/>   | <input type="radio"/> |
| 13. Mi ha permesso di ridurre i tempi di attesa per l'erogazione delle visite                                                | <input type="radio"/>  | <input type="radio"/>       | <input type="radio"/>                | <input type="radio"/>   | <input type="radio"/> |
| 14. È stato di grande utilità per i pazienti consolidati e per i follow-up di routine                                        | <input type="radio"/>  | <input type="radio"/>       | <input type="radio"/>                | <input type="radio"/>   | <input type="radio"/> |
| 15. Non sostituisce la visita in presenza ma può completarla                                                                 | <input type="radio"/>  | <input type="radio"/>       | <input type="radio"/>                | <input type="radio"/>   | <input type="radio"/> |
| 16. Rappresenta un'opzione importante e utile per l'assistenza clinica                                                       | <input type="radio"/>  | <input type="radio"/>       | <input type="radio"/>                | <input type="radio"/>   | <input type="radio"/> |
| 17. Attraverso il consulto a distanza sono riuscito a spiegare adeguatamente le indicazioni farmacologiche che ho prescritto | <input type="radio"/>  | <input type="radio"/>       | <input type="radio"/>                | <input type="radio"/>   | <input type="radio"/> |

18. Attraverso il consulto a distanza sono riuscito a spiegare adeguatamente la condizione clinica al paziente

☐☐☐☐☐

19. Ritengo che questo sistema mi abbia permesso di fornire complessivamente informazioni sufficienti al paziente

☐☐☐☐☐

20. Quando sarà finita l'emergenza sanitaria vorrei continuare ad usufruire di tale servizio

☐☐☐☐☐

21. Lo consiglierei ad altri colleghi

☐☐☐☐☐

22. Dovrebbe diventare parte integrante della pratica clinica ordinaria per l'assistenza sanitaria in futuro

☐☐☐☐☐

23. Mi sono sentito/a a mio agio nel comunicare con il paziente a distanza

☐☐☐☐☐

24. Ritengo che questo sistema mi abbia permesso di essere sufficientemente accurato nel corso della visita

☐☐☐☐☐

PENSA ALL'INTERAZIONE CHE HAI AVUTO CON IL PAZIENTE DURANTE IL VIDEOCONSULTO ED ESPRIMI IL GRADO DI ACCORDO/DISACCORDO CON LE SEGUENTI AFFERMAZIONI

|                                                                                            | Per nulla<br>d'accordo | Abbastanza<br>in disaccordo | Né in accordo<br>né in<br>disaccordo | Abbastanza<br>d'accordo | Molto<br>D'accordo    |
|--------------------------------------------------------------------------------------------|------------------------|-----------------------------|--------------------------------------|-------------------------|-----------------------|
| 25. È stato facile esprimermi in modo efficace con il paziente                             | <input type="radio"/>  | <input type="radio"/>       | <input type="radio"/>                | <input type="radio"/>   | <input type="radio"/> |
| 26. Ho potuto comprendere chiaramente quello che mi diceva il paziente                     | <input type="radio"/>  | <input type="radio"/>       | <input type="radio"/>                | <input type="radio"/>   | <input type="radio"/> |
| 27. Sono riuscito a relazionarmi con il paziente come se fossimo in una visita in presenza | <input type="radio"/>  | <input type="radio"/>       | <input type="radio"/>                | <input type="radio"/>   | <input type="radio"/> |
| 28. È stato confortevole erogare un consulto neurologico a distanza                        | <input type="radio"/>  | <input type="radio"/>       | <input type="radio"/>                | <input type="radio"/>   | <input type="radio"/> |
| 29. Mi sono sentito/a a mio agio nell'utilizzare gli strumenti digitali                    | <input type="radio"/>  | <input type="radio"/>       | <input type="radio"/>                | <input type="radio"/>   | <input type="radio"/> |
| 30. Mi sono sentito/a a mio agio nell'interagire con il paziente                           | <input type="radio"/>  | <input type="radio"/>       | <input type="radio"/>                | <input type="radio"/>   | <input type="radio"/> |

31. Mi ha dato la possibilità di instaurare una buona relazione con il paziente

☐☐☐☐☐

32. Mi ha permesso di dedicare un tempo adeguato all'ascolto dei problemi del paziente

☐☐☐☐☐

-----

PENSA ALLA TUA ESPERIENZA DI CONSULTO NEUROLOGICO A DISTANZA ED ESPRIMI IL TUO GRADO DI SODDISFAZIONE RISPETTO ALLE SEGUENTI DIMENSIONI

|                                                         | Per nulla<br>soddisfatto | Abbastanza<br>insoddisfatto | Né soddisfatto<br>né<br>insoddisfatto | Abbastanza<br>soddisfatto | Molto<br>soddisfatto  |
|---------------------------------------------------------|--------------------------|-----------------------------|---------------------------------------|---------------------------|-----------------------|
| 33. Qualità complessiva del servizio erogato            | <input type="radio"/>    | <input type="radio"/>       | <input type="radio"/>                 | <input type="radio"/>     | <input type="radio"/> |
| 34. Attrezzatura digitale da me utilizzata              | <input type="radio"/>    | <input type="radio"/>       | <input type="radio"/>                 | <input type="radio"/>     | <input type="radio"/> |
| 35. Attrezzatura utilizzata dal paziente                | <input type="radio"/>    | <input type="radio"/>       | <input type="radio"/>                 | <input type="radio"/>     | <input type="radio"/> |
| 36. Puntualità del servizio erogato                     | <input type="radio"/>    | <input type="radio"/>       | <input type="radio"/>                 | <input type="radio"/>     | <input type="radio"/> |
| 37. Utilità nel fornire assistenza sanitaria            | <input type="radio"/>    | <input type="radio"/>       | <input type="radio"/>                 | <input type="radio"/>     | <input type="radio"/> |
| 38. Tempo intercorso tra la prenotazione ed il consulto | <input type="radio"/>    | <input type="radio"/>       | <input type="radio"/>                 | <input type="radio"/>     | <input type="radio"/> |

-----

TI CHIEDIAMO ORA DI PENSARE ALLE DIFFERENZE TRA VISITA NEUROLOGICA IN PRESENZA E CONSULTO NEUROLOGICO A DISTANZA. IN PARTICOLARE, CI INTERESSA CAPIRE PER OGNI ASPETTO PRESO AD ESAME SE SIA MEGLIO UN SERVIZIO IN PRESENZA, IL CONSULTO ONLINE OPPURE SE RITIENI NON CI SIANO DIFFERENZE

|                                                             | Meglio visita in<br>presenza | Meglio online         | Non ci sono<br>differenze |
|-------------------------------------------------------------|------------------------------|-----------------------|---------------------------|
| 39. Accuratezza della visita                                | <input type="radio"/>        | <input type="radio"/> | <input type="radio"/>     |
| 40. Prescrizioni farmacologiche                             | <input type="radio"/>        | <input type="radio"/> | <input type="radio"/>     |
| 41. Durata della visita                                     | <input type="radio"/>        | <input type="radio"/> | <input type="radio"/>     |
| 42. Puntualità della visita                                 | <input type="radio"/>        | <input type="radio"/> | <input type="radio"/>     |
| 43. Possibilità di fare domande al paziente                 | <input type="radio"/>        | <input type="radio"/> | <input type="radio"/>     |
| 44. Facilità di comprensione di quello che dice il paziente | <input type="radio"/>        | <input type="radio"/> | <input type="radio"/>     |
| 45. Rispetto della privacy                                  | <input type="radio"/>        | <input type="radio"/> | <input type="radio"/>     |
