# Supplementary material for: The Impact of Telemedicine on Parkinson’s Care during the COVID-19 Pandemic: An Italian Online Survey
Source: MDPI journal article supplement (doi:10.3390/healthcare10061065), 2022-06-08
Supplement: s1 [file s1]

# Teleconsulto lato paziente

---

## L'IMPATTO DEL COVID-19 SULL'USO DELLA TELEMEDICINA NELLA CURA DEI DISORDINI DEL MOVIMENTO

---

Caro partecipante,  
siamo un team di psicologi del Policlinico di Milano e sociologi dell'Università Cattolica impegnati nella ricerca di nuovi modelli sanitari per le malattie croniche neurologiche, come la malattia di Parkinson e le sindromi parkinsoniane atipiche, capaci di supportare adeguatamente i pazienti anche in questo momento di emergenza Covid-19. Durante questo periodo, per ridurre gli accessi in ospedale e le probabilità di contagio, molti controlli neurologici in presenza sono stati convertiti in visite da remoto attraverso differenti modalità (Telefono, Email, SMS, Chat, Videoconsulto). Ti chiediamo solo 10 minuti del tuo tempo per avere la tua opinione sulla qualità dei consulti neurologici a distanza ricevuti durante questo periodo pandemico. La tua partecipazione è volontaria, in qualsiasi momento potrai interrompere la compilazione senza dover fornire alcuna giustificazione.

I dati che ti riguardano saranno ritenuti come strettamente confidenziali e soggetti ad anonimato, i risultati potranno essere portati a conoscenza di terzi o pubblicati, ma escludendo ogni possibile riferimento personale. Ci si atterrà in ogni caso alle disposizioni normative vigenti relative alla tutela della privacy del soggetto (art.11 D.Lgs. 196/2003 – Codice in materia di protezione dei dati personali e all'art. 13 del GDPR 679/16 – “Regolamento europeo sulla protezione dei dati personali”).

---

Proseguendo con la compilazione, acconsenti al trattamento dei dati  
(se non acconsenti, non potrai partecipare alla ricerca)

- ☐ Acconsento
- ☐ Non acconsento

Età

---

Genere

☐ Maschio

☐ Femmina

Titolo di studio

☐ Licenza elementare

☐ Licenza media

☐ Diploma

☐ Laurea

Stato occupazionale

☐ Lavoratore/trice

☐ Pensionato/a

☐ Inoccupato/a

☐ Altro 

---

Regione in cui risiedi:

- ☐ Abruzzo
- ☐ Basilicata
- ☐ Calabria
- ☐ Campania
- ☐ Emilia-Romagna
- ☐ Friuli Venezia Giulia
- ☐ Lazio
- ☐ Liguria
- ☐ Lombardia
- ☐ Marche
- ☐ Molise
- ☐ Piemonte
- ☐ Puglia
- ☐ Sardegna
- ☐ Sicilia
- ☐ Toscana
- ☐ Trentino-Alto Adige
- ☐ Umbria
- ☐ Valle d'Aosta
- ☐ Veneto

-----

Ricevi assistenza neurologica nella stessa Regione in cui risiedi?

☐ Sì

☐ No

---

Regione in cui ricevi assistenza neurologica:

- ☐ Abruzzo
  - ☐ Basilicata
  - ☐ Calabria
  - ☐ Campania
  - ☐ Emilia-Romagna
  - ☐ Friuli Venezia Giulia
  - ☐ Lazio
  - ☐ Liguria
  - ☐ Lombardia
  - ☐ Marche
  - ☐ Molise
  - ☐ Piemonte
  - ☐ Puglia
  - ☐ Sardegna
  - ☐ Sicilia
  - ☐ Toscana
  - ☐ Trentino-Alto Adige
  - ☐ Umbria
  - ☐ Valle d'Aosta
  - ☐ Veneto
-

## Diagnosi

- ☐ Malattia di Parkinson
- ☐ Parkinsonismo atipico

-----

Anno in cui hai ricevuto la diagnosi

\_\_\_\_\_

-----

Attualmente, come giudichi la tua condizione motoria?

- ☐ Il mio disturbo motorio è minimo o assente ed interessa solo una parte del corpo
  - ☐ Il mio disturbo motorio interessa entrambe le parti del corpo ma non ho problemi di equilibrio
  - ☐ Nei cambi di posizione avverto una lieve difficoltà a mantenere l'equilibrio ma questo non interferisce con il mio grado di autonomia
  - ☐ Cammino con difficoltà e quasi sempre necessito di un aiuto
  - ☐ Non cammino autonomamente e necessito di aiuto per svolgere tutte le attività quotidiane
- 

Hai ricevuto una diagnosi di una o più patologie croniche tra le seguenti?

- ☐ Psichiatriche
  - ☐ Decadimento cognitivo
  - ☐ No, nessuna delle precedenti
-

Hai mai avuto la possibilità di eseguire la visita neurologica a distanza prima della pandemia Covid-19 (per es. telefono, SMS, Chat, E-mail, Videoconsulto)?

- ☐ Sì
- ☐ No
- 

Durante la pandemia Covid-19, hai avuto la possibilità di accedere a soluzioni alternative alla visita neurologica in presenza (per es. telefono, SMS, Chat, E-mail, Videoconsulto)?

- ☐ Sì
- ☐ No
- 

Hai ricevuto assistenza tecnica da parte di un'altra persona per accedere al consulto neurologico a distanza?

- ☐ Sì
- ☐ No
- 

Durante la pandemia Covid-19, per quali problematiche hai richiesto un consulto con il neurologo?

- ☐ Visita di controllo periodica
- ☐ Prescrizioni farmacologiche
- ☐ Regolazione dei parametri DBS
- ☐ Comparsa di effetti collaterali ai farmaci (dispercezioni visive, alterazioni del comportamento, ect)
- ☐ Altro \_\_\_\_\_

Chi ti ha informato della possibilità di eseguire la visita neurologia attraverso un consulto a distanza?

- ☐ Medico
  - ☐ Associazioni di pazienti
  - ☐ Altri pazienti
  - ☐ Internet
  - ☐ Altro \_\_\_\_\_
- 

Quali strumenti digitali hai utilizzato per accedere al consulto neurologico a distanza? (possibili più risposte)

- ☐ Telefono
  - ☐ Email
  - ☐ SMS
  - ☐ Chat
  - ☐ Videoconsulto es. videochiamata in WhatsApp, Skype, Zoom, Microsoft Teams
  - ☐ Altro \_\_\_\_\_
-



ORA TI CHIEDIAMO DI FOCALIZZARTI SULLA TUA ESPERIENZA DI VIDEOCONSULTO (ES. VIDEOCHIAMATA IN WHATSAPP, SKYPE, ZOOM, MICROSOFT TEAMS) E DI PENSARE AGLI ASPETTI TECNICI. ESPRIMI IL TUO GRADO DI ACCORDO/DISACCORDO CON LE SEGUENTI AFFERMAZIONI

|                                                                                                                                | Per nulla<br>d'accordo | Abbastanza<br>in disaccordo | Né in<br>accordo né in<br>disaccordo | Abbastanza<br>d'accordo | Molto<br>d'accordo    |
|--------------------------------------------------------------------------------------------------------------------------------|------------------------|-----------------------------|--------------------------------------|-------------------------|-----------------------|
| 1. Ritengo di avere le competenze informatiche necessarie                                                                      | <input type="radio"/>  | <input type="radio"/>       | <input type="radio"/>                | <input type="radio"/>   | <input type="radio"/> |
| 2. Ritengo di essere in possesso di strumentazioni informatiche e digitali adeguate                                            | <input type="radio"/>  | <input type="radio"/>       | <input type="radio"/>                | <input type="radio"/>   | <input type="radio"/> |
| 3. Ritengo di aver ricevuto tutte le istruzioni necessarie per l'espletamento del consulto neurologico (password, link, altro) | <input type="radio"/>  | <input type="radio"/>       | <input type="radio"/>                | <input type="radio"/>   | <input type="radio"/> |
| 4. Ritengo che sia stato semplice concordare un appuntamento con il neurologo                                                  | <input type="radio"/>  | <input type="radio"/>       | <input type="radio"/>                | <input type="radio"/>   | <input type="radio"/> |
| 5. La qualità dell'audio durante il consulto neurologico è stata adeguata                                                      | <input type="radio"/>  | <input type="radio"/>       | <input type="radio"/>                | <input type="radio"/>   | <input type="radio"/> |

6. La qualità  
del video  
durante il  
consulto  
neurologico è  
stata  
adeguata

☐☐☐☐☐

7. Ogni volta  
che ho  
riscontrato  
problemi  
tecnici ho  
risolto  
facilmente e  
rapidamente

☐☐☐☐☐

8. È stato  
semplice  
usare i sistemi  
digitali per il  
consulto

☐☐☐☐☐

9. È stato  
facile  
imparare ad  
usare i sistemi  
digitali per il  
consulto

☐☐☐☐☐

10. Credo che  
potrei  
diventare  
sempre più  
esperto  
utilizzando  
servizi digitali  
per accedere  
a prestazioni  
sanitarie

☐☐☐☐☐

11. Ritengo  
che la mia  
privacy sia  
stata  
rispettata

☐☐☐☐☐

ORA PENSA ALLA TUA ESPERIENZA DI VIDEOCONSULTO NEUROLOGICO A DISTANZA  
ED ESPRIMI IL GRADO DI ACCORDO/DISACCORDO CON LE SEGUENTI AFFERMAZIONI

|                                                                                                             | Per nulla<br>d'accordo | Abbastanza<br>in disaccordo | Né in<br>accordo né in<br>disaccordo | Abbastanza<br>d'accordo | Molto<br>d'accordo    |
|-------------------------------------------------------------------------------------------------------------|------------------------|-----------------------------|--------------------------------------|-------------------------|-----------------------|
| 12. Mi ha permesso di risparmiare il tempo evitando di dover raggiungere fisicamente la struttura sanitaria | <input type="radio"/>  | <input type="radio"/>       | <input type="radio"/>                | <input type="radio"/>   | <input type="radio"/> |
| 13. Mi ha permesso di ridurre i tempi di attesa della visita                                                | <input type="radio"/>  | <input type="radio"/>       | <input type="radio"/>                | <input type="radio"/>   | <input type="radio"/> |
| 14. Mi ha permesso di risparmiare denaro                                                                    | <input type="radio"/>  | <input type="radio"/>       | <input type="radio"/>                | <input type="radio"/>   | <input type="radio"/> |
| 15. Ha migliorato le mie condizioni di salute                                                               | <input type="radio"/>  | <input type="radio"/>       | <input type="radio"/>                | <input type="radio"/>   | <input type="radio"/> |
| 16. Mi ha permesso di essere coinvolto più attivamente nella gestione della mia salute                      | <input type="radio"/>  | <input type="radio"/>       | <input type="radio"/>                | <input type="radio"/>   | <input type="radio"/> |
| 17. Sono stato meno preoccupato/a per la mia condizione di salute                                           | <input type="radio"/>  | <input type="radio"/>       | <input type="radio"/>                | <input type="radio"/>   | <input type="radio"/> |
| 18. Attraverso il consulto a distanza ho compreso adeguatamente le indicazioni farmacologiche prescritte    | <input type="radio"/>  | <input type="radio"/>       | <input type="radio"/>                | <input type="radio"/>   | <input type="radio"/> |

19. Attraverso il consulto a distanza ho ricevuto informazioni adeguate sulla mia condizione clinica

☐☐☐☐☐

20. Attraverso il consulto a distanza ho ricevuto complessivamente informazioni sufficienti

☐☐☐☐☐

21. Quando sarà finita l'emergenza sanitaria, vorrei continuare ad usufruire di tale servizio

☐☐☐☐☐

22. Lo consiglierei ad un'altra persona

☐☐☐☐☐

23. Mi sono sentito/a a mio agio nel comunicare con il neurologo a distanza

☐☐☐☐☐

24. Le informazioni ricevute sono state sufficientemente accurate

☐☐☐☐☐

-----

PENSA ALL'INTERAZIONE CHE HAI AVUTO CON IL TUO NEUROLOGO DURANTE IL VIDEOCONSULTO ED ESPRIMI IL GRADO DI ACCORDO/DISACCORDO CON LE SEGUENTI AFFERMAZIONI

|                                                                                             | Per nulla<br>d'accordo | Abbastanza<br>in disaccordo | Né in accordo<br>né in<br>disaccordo | Abbastanza<br>d'accordo | Molto<br>d'accordo    |
|---------------------------------------------------------------------------------------------|------------------------|-----------------------------|--------------------------------------|-------------------------|-----------------------|
| 25. È stato facile esprimermi in modo efficace durante il consulto                          | <input type="radio"/>  | <input type="radio"/>       | <input type="radio"/>                | <input type="radio"/>   | <input type="radio"/> |
| 26. Ho potuto comprendere chiaramente quello che mi diceva il neurologo                     | <input type="radio"/>  | <input type="radio"/>       | <input type="radio"/>                | <input type="radio"/>   | <input type="radio"/> |
| 27. Sono riuscito a relazionarmi con il neurologo come se fossimo in una visita in presenza | <input type="radio"/>  | <input type="radio"/>       | <input type="radio"/>                | <input type="radio"/>   | <input type="radio"/> |
| 28. È stato confortevole ricevere un consulto neurologico senza spostarmi da casa           | <input type="radio"/>  | <input type="radio"/>       | <input type="radio"/>                | <input type="radio"/>   | <input type="radio"/> |
| 29. Mi sono sentito/a a mio agio nell'utilizzare gli strumenti digitali                     | <input type="radio"/>  | <input type="radio"/>       | <input type="radio"/>                | <input type="radio"/>   | <input type="radio"/> |
| 30. Mi sono sentito/a a mio agio nell'interagire con il neurologo                           | <input type="radio"/>  | <input type="radio"/>       | <input type="radio"/>                | <input type="radio"/>   | <input type="radio"/> |

31. Mi ha dato  
la possibilità di  
instaurare una  
buona relazione  
con il neurologo

☐☐☐☐☐

32. Mi sono  
sentito accolto  
nonostante la  
distanza fisica

☐☐☐☐☐

33. Il neurologo  
ha dedicato un  
tempo  
adeguato  
all'ascolto dei  
miei problemi

☐☐☐☐☐

34. Durante il  
consulto il  
neurologo ha  
mostrato un  
atteggiamento  
empatico

☐☐☐☐☐

PENSA ALLA TUA ESPERIENZA DI CONSULTO NEUROLOGICO A DISTANZA ED ESPRIMI IL TUO GRADO DI SODDISFAZIONE RISPETTO ALLE SEGUENTI DIMENSIONI

|                                                                | Per nulla<br>soddisfatto | Abbastanza<br>insoddisfatto | Né soddisfatto<br>né insoddisfatto | Abbastanza<br>soddisfatto | Molto<br>soddisfatto  |
|----------------------------------------------------------------|--------------------------|-----------------------------|------------------------------------|---------------------------|-----------------------|
| 35. Qualità complessiva del servizio ricevuto                  | <input type="radio"/>    | <input type="radio"/>       | <input type="radio"/>              | <input type="radio"/>     | <input type="radio"/> |
| 36. Attrezzatura digitale utilizzata dal professionista        | <input type="radio"/>    | <input type="radio"/>       | <input type="radio"/>              | <input type="radio"/>     | <input type="radio"/> |
| 37. Attrezzatura digitale da me utilizzata                     | <input type="radio"/>    | <input type="radio"/>       | <input type="radio"/>              | <input type="radio"/>     | <input type="radio"/> |
| 38. Puntualità del servizio ricevuto                           | <input type="radio"/>    | <input type="radio"/>       | <input type="radio"/>              | <input type="radio"/>     | <input type="radio"/> |
| 39. Utile strumento per ricevere assistenza sanitaria          | <input type="radio"/>    | <input type="radio"/>       | <input type="radio"/>              | <input type="radio"/>     | <input type="radio"/> |
| 40. Attenzione adeguata al mio bisogno di assistenza sanitaria | <input type="radio"/>    | <input type="radio"/>       | <input type="radio"/>              | <input type="radio"/>     | <input type="radio"/> |
| 41. Tempo intercorso tra la prenotazione ed il consulto        | <input type="radio"/>    | <input type="radio"/>       | <input type="radio"/>              | <input type="radio"/>     | <input type="radio"/> |

TI CHIEDIAMO ORA DI PENSARE ALLE DIFFERENZE TRA VISITA NEUROLOGICA IN PRESENZA E CONSULTO NEUROLOGICO A DISTANZA. IN PARTICOLARE, CI INTERESSA CAPIRE PER OGNI ASPETTO PRESO AD ESAME SE SIA MEGLIO UN SERVIZIO IN PRESENZA, IL CONSULTO ONLINE OPPURE SE RITIENI NON CI SIANO DIFFERENZE

|                                                                   | Meglio visita in presenza | Meglio online         | Non ci sono differenze |
|-------------------------------------------------------------------|---------------------------|-----------------------|------------------------|
| 42. Accuratezza della visita                                      | <input type="radio"/>     | <input type="radio"/> | <input type="radio"/>  |
| 43. Valutazione delle prescrizioni farmacologiche                 | <input type="radio"/>     | <input type="radio"/> | <input type="radio"/>  |
| 44. Durata della visita                                           | <input type="radio"/>     | <input type="radio"/> | <input type="radio"/>  |
| 45. Puntualità della visita                                       | <input type="radio"/>     | <input type="radio"/> | <input type="radio"/>  |
| 46. Possibilità di essere ascoltati                               | <input type="radio"/>     | <input type="radio"/> | <input type="radio"/>  |
| 47. Grado di empatia del professionista                           | <input type="radio"/>     | <input type="radio"/> | <input type="radio"/>  |
| 48. Possibilità di fare domande al professionista                 | <input type="radio"/>     | <input type="radio"/> | <input type="radio"/>  |
| 49. Facilità di comprensione di quello che dice il professionista | <input type="radio"/>     | <input type="radio"/> | <input type="radio"/>  |
| 50. Rispetto della privacy                                        | <input type="radio"/>     | <input type="radio"/> | <input type="radio"/>  |
